# Supplementary material for: Machine learning-based prediction of hospital prolonged length of stay admission at emergency department: a Gradient Boosting algorithm analysis
Source: PubMed Central journal article supplement (PMC10426288; doi:10.3389/frai.2023.1179226), 2023-07-28
Supplement: Data_Sheet_1.pdf [file Data_Sheet_1.pdf]

## Appendix:

Table S1. Description of independent features and outcomes.

| Features                                                           | Measure categories                                                                                                                                                                                                                                                                                                                                                                                                                                                                                                                                                                                                                                                                                                                                             |
|--------------------------------------------------------------------|----------------------------------------------------------------------------------------------------------------------------------------------------------------------------------------------------------------------------------------------------------------------------------------------------------------------------------------------------------------------------------------------------------------------------------------------------------------------------------------------------------------------------------------------------------------------------------------------------------------------------------------------------------------------------------------------------------------------------------------------------------------|
| Case ID                                                            | A unique ID for identification of inpatients                                                                                                                                                                                                                                                                                                                                                                                                                                                                                                                                                                                                                                                                                                                   |
| Demographic                                                        |                                                                                                                                                                                                                                                                                                                                                                                                                                                                                                                                                                                                                                                                                                                                                                |
| Age                                                                | Patient Age in classes:<br>[0 - 17), (18 - 29), (30 - 49), (50- 69), 70+                                                                                                                                                                                                                                                                                                                                                                                                                                                                                                                                                                                                                                                                                       |
| Gender                                                             | The state of being female = 1 or male = 0                                                                                                                                                                                                                                                                                                                                                                                                                                                                                                                                                                                                                                                                                                                      |
| Arrival mode/admission source                                      | Ambulance -118                                                                                                                                                                                                                                                                                                                                                                                                                                                                                                                                                                                                                                                                                                                                                 |
|                                                                    | Own vehicle/walk-in                                                                                                                                                                                                                                                                                                                                                                                                                                                                                                                                                                                                                                                                                                                                            |
|                                                                    | Others                                                                                                                                                                                                                                                                                                                                                                                                                                                                                                                                                                                                                                                                                                                                                         |
| Risk categories – triaging in entrance                             | Red – Emergency                                                                                                                                                                                                                                                                                                                                                                                                                                                                                                                                                                                                                                                                                                                                                |
|                                                                    | Orange – indifferible urgency                                                                                                                                                                                                                                                                                                                                                                                                                                                                                                                                                                                                                                                                                                                                  |
|                                                                    | Light blue – differable urgency                                                                                                                                                                                                                                                                                                                                                                                                                                                                                                                                                                                                                                                                                                                                |
|                                                                    | Green – minor urgency                                                                                                                                                                                                                                                                                                                                                                                                                                                                                                                                                                                                                                                                                                                                          |
|                                                                    | White – not urgency                                                                                                                                                                                                                                                                                                                                                                                                                                                                                                                                                                                                                                                                                                                                            |
| Specialty                                                          | General medicine, geriatry , astanteria , obstetrics and gynecology , pediatrics , general surgery, infectious and tropical diseases, orthopedics and traumatology, urology, coronary unit, pediatric surgery, gastroenterology, cardiology, intensive care, pneumology, nephrology, oncology, vascular surgery                                                                                                                                                                                                                                                                                                                                                                                                                                                |
|                                                                    | Others (damages, details nephrology (enabled for transplantation), neonatology, pediatric oncology, semi-intensive therapy , maxillo facial surgery , hematology, thoracic surgery, ophthalmology , heart surgery , neonatal intensive care , pediatric heart surgery , and dermatology)                                                                                                                                                                                                                                                                                                                                                                                                                                                                       |
| Most frequent problems                                             | Dyspnea, abdominal pain, fever/hyperpyrexia/hyperthermia, problems in pregnancy > 20th week, non-specific minor disorders ,chest pain of suspected cardiovascular cause, syncope / pre-syncope, generalized asthenia, politrauma – contusive, pain at the side, nausea and / or vomiting repeated, heart palm / irregular wrist altered level of consciousness, state of confusion, hematochezia / rectorrhage / melena, lower limbs injury, cough / congestion, lower limbs pain, chest pain not suspected due to cardiovascular cause, pallor / anemia, request for urgent specialist advice, macro-hematuria, diarrhea, request for prescription or performance, swollen /edematous leg, weakness of extremities / symptoms associated with cerebrovascular |
| # problems are not only diseases specific also any other problems. |                                                                                                                                                                                                                                                                                                                                                                                                                                                                                                                                                                                                                                                                                                                                                                |

|                         |                                                                                                                     |
|-------------------------|---------------------------------------------------------------------------------------------------------------------|
|                         | disease, symptoms of infection of the urinary tract, diagnostics for biochemical images / examinations, head trauma |
|                         | Other problems (more than 135 cases, a few in numbers)                                                              |
| PLoS – outcome variable | LoS < 6 / LoS ≥ 6 days as binary outcome ;<br>LoS [0 to 120 days) as continuous outcome                             |

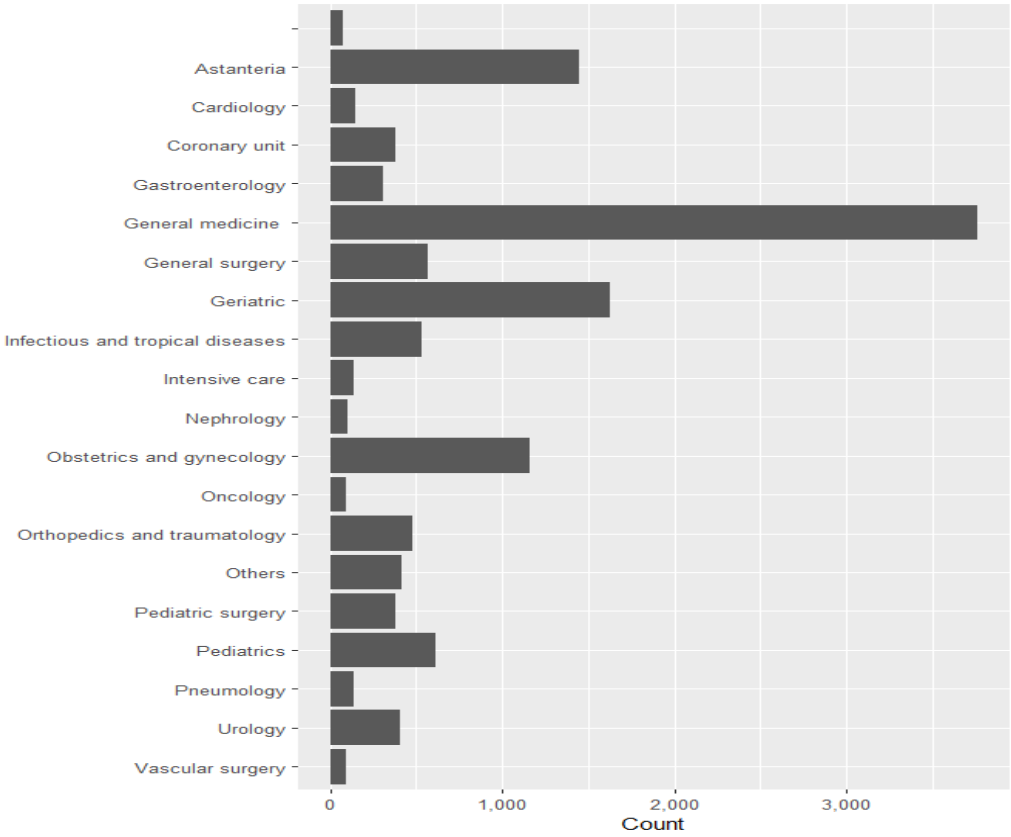

Fig S1. Frequency of type of length of stay (specialty) or Hospital wards during admission patients in 12858 patients the emergency department (ED) of the Sant'Orsola, Malpighi University Hospital of Bologna between January and October 2022.

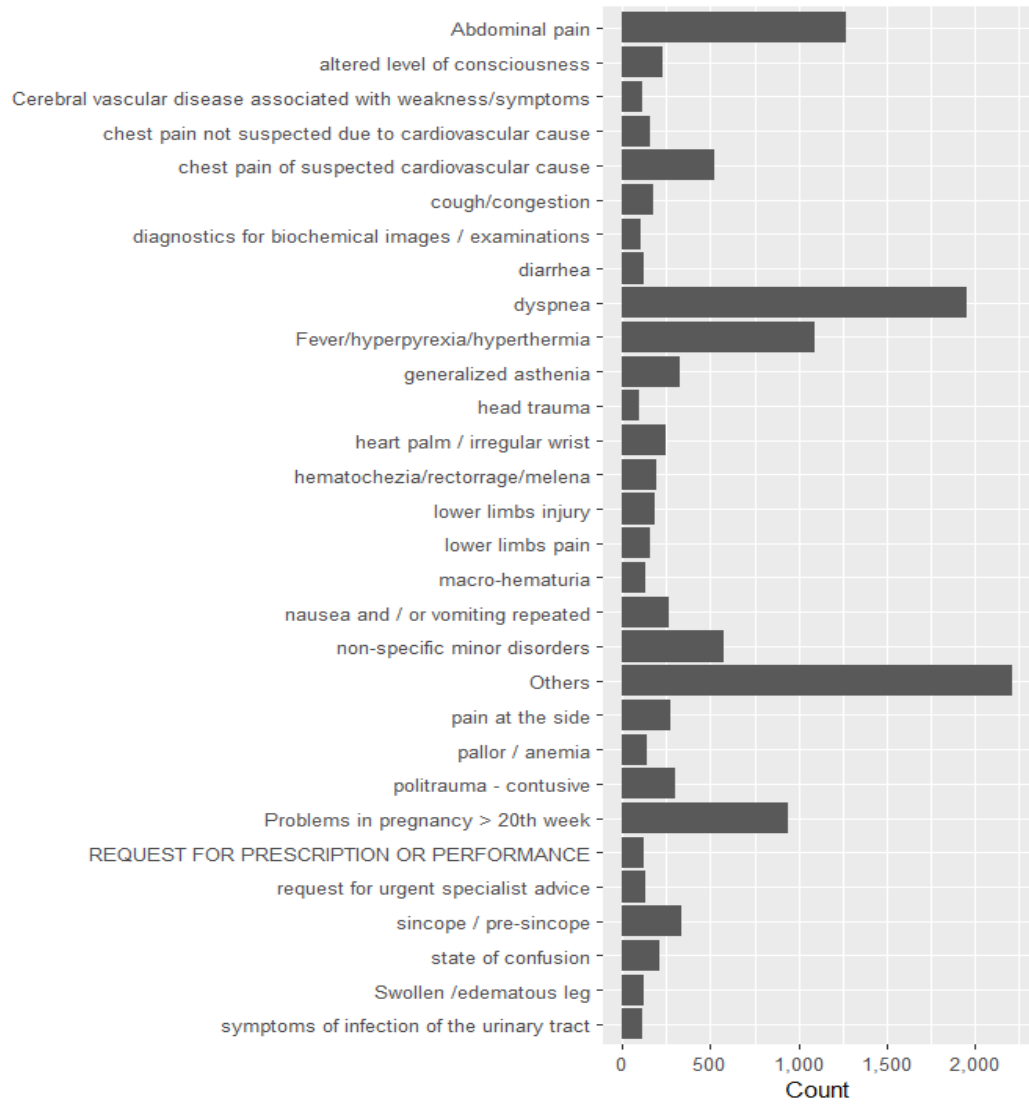

Fig S2. Frequency of most frequent problems during admission or Chief complaint for admission in 12858 patients in the emergency department (ED) of the Sant'Orsola, Malpighi University Hospital of Bologna
